# Supplementary material for: The complete chloroplast genomes of Tetrastigma hemsleyanum (Vitaceae) from different regions of China: Molecular structure, comparative analysis and development of DNA barcodes for its geographical origin discrimination
Source: Research Square preprint supplement (doi:10.21203/rs.3.rs-1308872/v1), 2022-02-11
Supplement: Supplementary file 3 [file 138eff3079859e914037b8da.docx]

Supplementary Material Figures


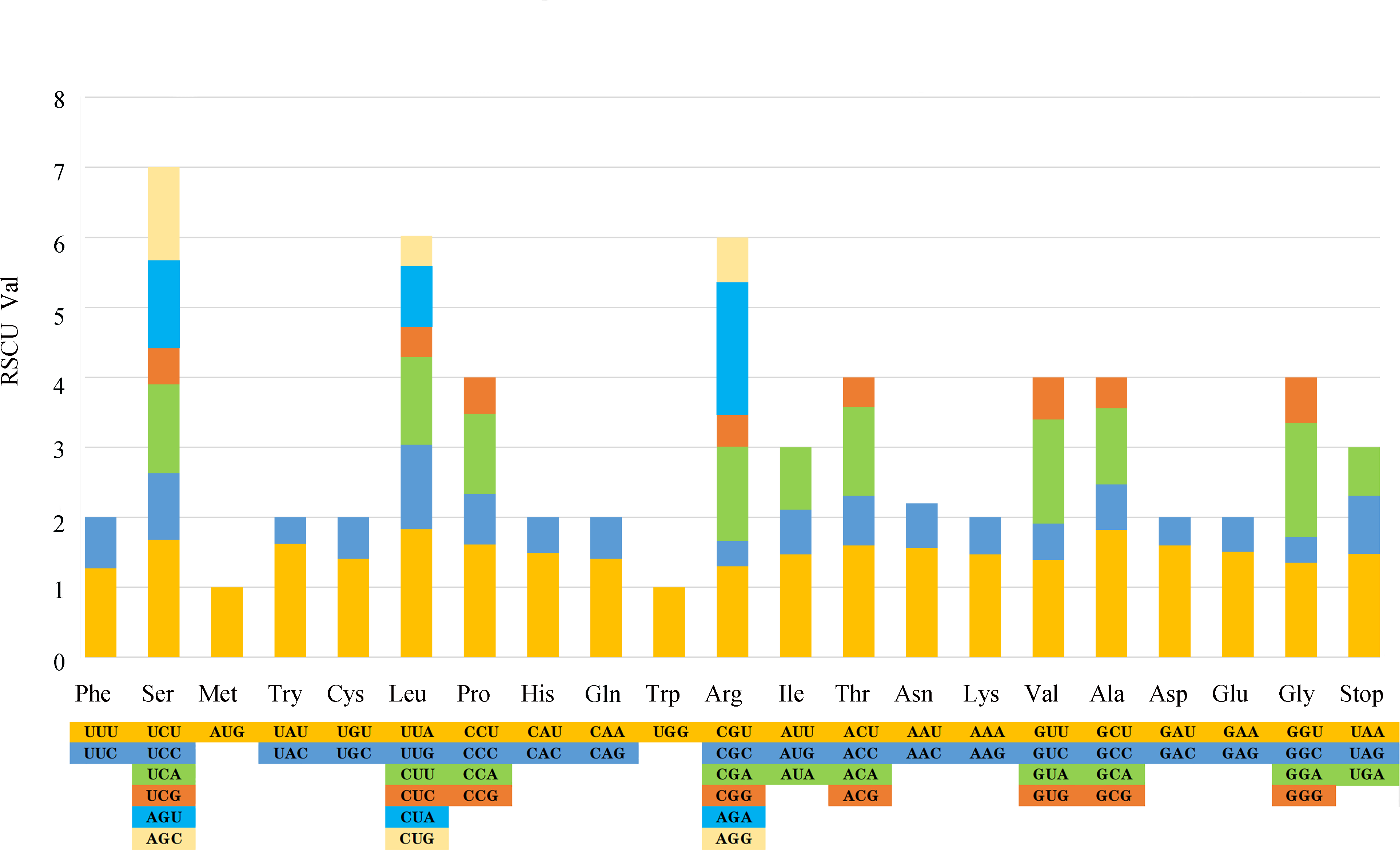


**Supplementary Figure 1.** The RSCU value of the 20 amino acids and stop codons in all the protein- coding genes of the chloroplast genome of *Tetrastigma hemsleyanum* sample from Jiangxi Province.

Supplementary Material


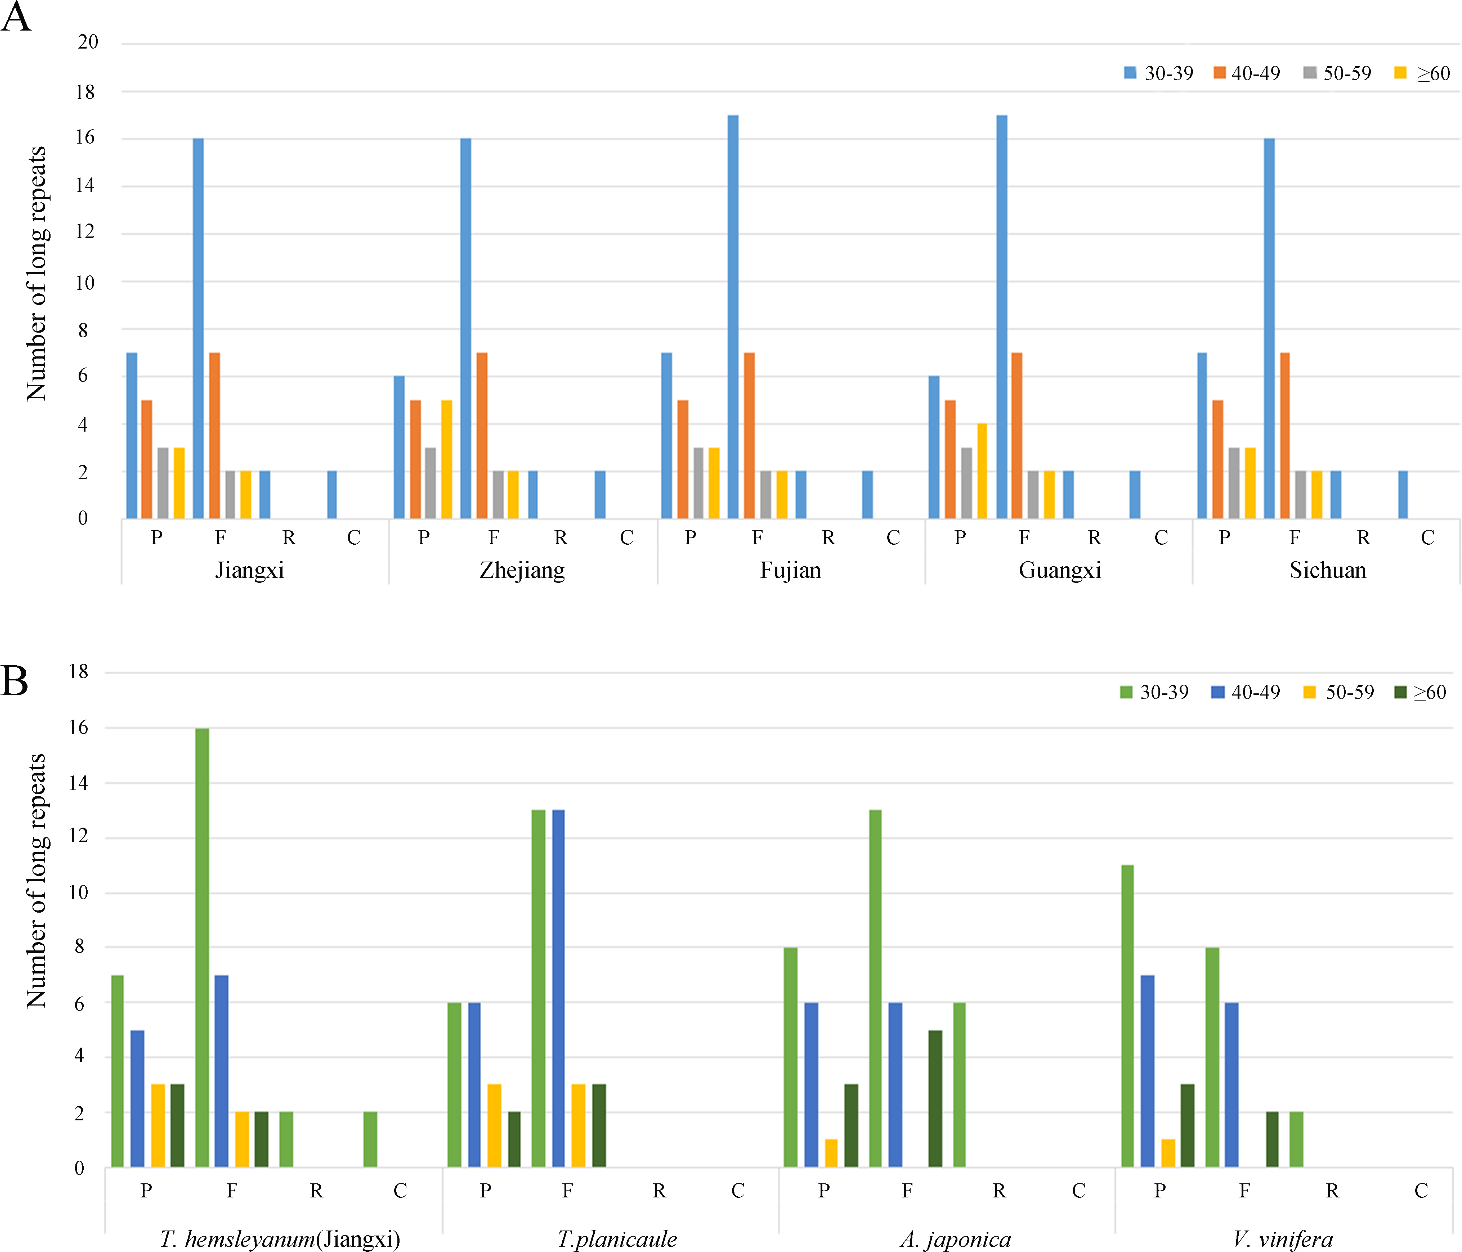


**Supplementary Figure 2.** Analysis of the long repeats in cp genomes of Vitaceae plants and *Tetrastigma hemsleyanum* species with different geographical origins. **(A)** The number, length and type of the long repeats identified in five samples of *Tetrastigma hemsleyanum*. (**B**) The number, length and type of the long repeats detected in *Tetrastigma hemsleyanum* (Jiangxi Province), *Tetrastigma planicaule*, *Ampelopsis japonica* and *Vitis vinifera* cp genomes.
